# Supplementary figures and images for: The Potential Mechanism of Bufadienolide-Like Chemicals on Breast Cancer via Bioinformatics Analysis
Source: MDPI journal article supplement (doi:10.3390/cancers11010091), 2019-01-14

K

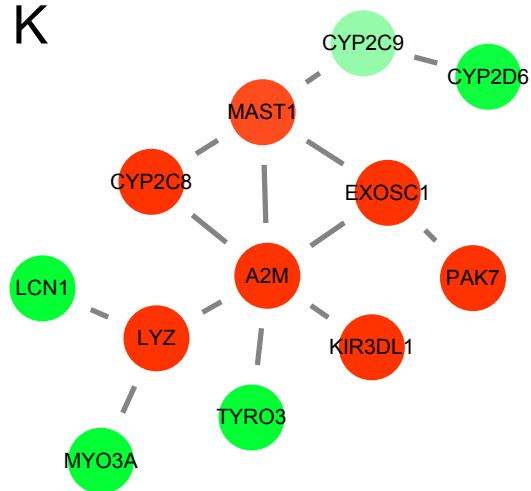

L

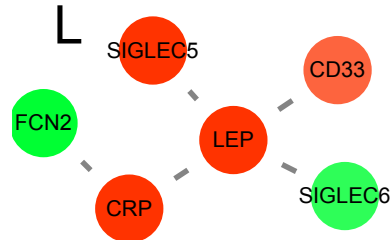

M

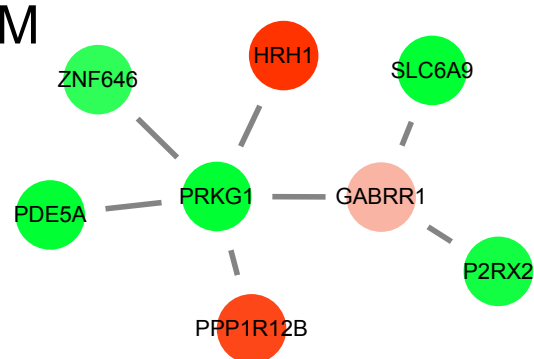

N

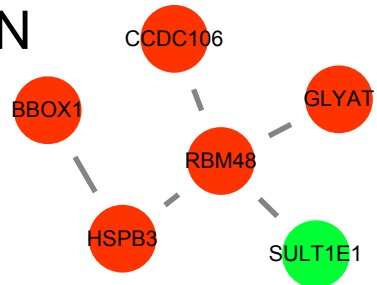

O

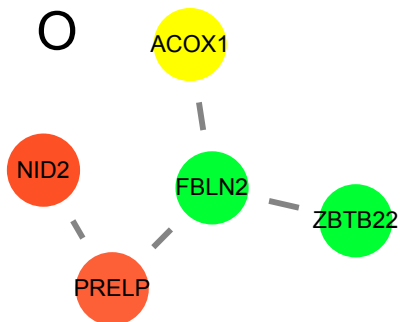

P

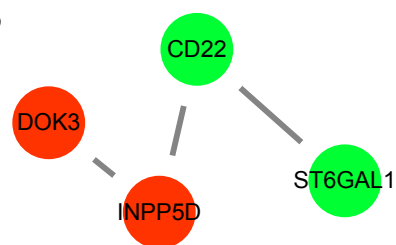

Q

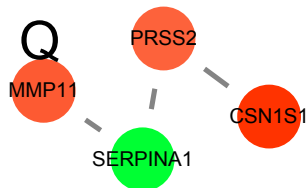

R

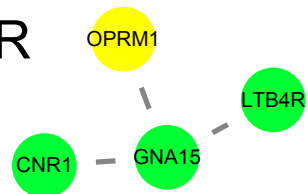

S

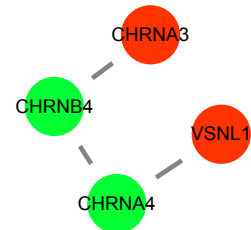

Supplement: s1 [file s1]
